1 **Determining targeting specificity of nuclear-encoded organelle proteins with the**  
2 **self-assembling split fluorescent protein toolkit**

3

4

5 Mayank Sharma<sup>1\*</sup>, Carola Kretschmer<sup>2</sup>, Christina Lampe<sup>1</sup>, Johannes Stuttmann<sup>2</sup> and Ralf  
6 Bernd Klösigen<sup>1</sup>

7

8

9 <sup>1</sup>Institute of Biology-Plant Physiology, Martin Luther University Halle-Wittenberg,  
10 Weinbergweg 10, 06120 Halle (Saale), Germany

11 <sup>2</sup>Institute of Biology-Genetics, Martin Luther University Halle-Wittenberg, Weinbergweg 10,  
12 06120 Halle (Saale), Germany

13

14

15

16

17

18 (\*) Corresponding author: Mayank Sharma

19 Phone: +49 - 345 - 55 26 204

20 e-mail: mayank796@gmail.com

21

22

23

24

25 *Running title:*

26 Determining protein targeting specificity with *sasplit*-GFP

27

28 *Keywords*

29 Self-assembling split-GFP, protein transport, mitochondria, chloroplast, dual targeting, *in vivo*  
30 imaging, Golden Gate cloning, technical advance

31

32

33

34

35

36

1 Abstract-

2

3 A large number of nuclear-encoded proteins are targeted to the organelles of endosymbiotic  
4 origin, namely mitochondria and plastids. To determine the targeting specificity of these  
5 proteins, fluorescent protein tagging is a popular approach. However, ectopic expression of  
6 fluorescent protein fusions commonly results in considerable background signals and often  
7 suffers from the large size and robust folding of the reporter protein, which may perturb  
8 membrane transport. Among the alternative approaches that have been developed in recent  
9 years, the self-assembling split-fluorescent protein (*sasplit*-FP) technology appears  
10 particularly promising to analyze protein targeting specificity *in vivo*. Here, we have improved  
11 this technology with respect to sensitivity and systematically evaluated its utilization to  
12 determine protein targeting to plastids and mitochondria. Furthermore, to facilitate high  
13 throughput screening of candidate proteins we have developed a *Golden Gate*-based vector  
14 toolkit, named PlaMiNGo (Plastid and/or Mitochondria targeted proteins N-terminally fused  
15 to GFP11 tags via *Golden Gate* cloning). As a result of these improvements, dual targeting  
16 could be detected for a number of proteins, which had earlier been characterized as being  
17 targeted to a single organelle only. These results were independently confirmed with a plant  
18 phenotype complementation approach thus demonstrating the sensitivity and robustness of the  
19 *sasplit*-FP-based method to analyze the targeting specificity of nuclear-encoded proteins.

20

21

22

23

24

25

26

27

28

29

30

1 1. Introduction-

2

3 Many nuclear-encoded proteins are targeted across membranes to reach their final destination  
4 in the cell, i.e. a sub-cellular compartment or cell organelle. To determine the specificity of  
5 such targeting, fluorescent protein tagging (FP tagging), that is, the fusion of the candidate  
6 protein with a fluorescent reporter (e.g., Green Fluorescent Protein, GFP) and subsequent *in*  
7 *vivo* imaging by fluorescence microscopy, is a popular approach. However, this widely  
8 utilized method carries some inherent pitfalls (reviewed by Moore and Murphy 2009). First,  
9 the large size and intrinsic folding properties of the reporter protein might perturb membrane  
10 transport of the candidate protein (Marques et al., 2004). Second, considerable background  
11 fluorescence signals due to protein overexpression and hence saturation of the organelle  
12 transport machinery is sometimes observed (Sharma et al., 2018a). And finally, proteins  
13 targeted to an organelle at low amounts are difficult to visualize using this approach due to  
14 weak fluorescence signals originating from a limited number of protein molecules.

15

16 These constraints become particularly prominent when it comes to the analysis of proteins  
17 targeted to mitochondria and/or plastids (Tanz et al., 2013). These organelle-targeted proteins  
18 usually carry an N-terminal transport signal called ‘transit peptide’ to facilitate transport of  
19 the passenger protein across the membranes via organelle specific translocation machineries.  
20 Amongst a repertoire of proteins encoded in the plant cell nucleus, more than 3000 are  
21 transported into mitochondria and/or plastids (Van Wijk and Baginsky 2011; Rao et al.,  
22 2017). While most of these proteins are targeted to only one type of organelle, a group of  
23 proteins exists with dual targeting specificity, i.e., they carry an ‘ambiguous’ transit peptide  
24 capable of translocating the passenger protein into both mitochondria and plastids (reviewed  
25 in Sharma et al., 2018b). Despite having dual targeting properties some of these proteins are  
26 still preferentially targeted to one of the two organelles. In this case, determining targeting  
27 specificity using a conventional FP-tagging approach is particularly tedious and error-prone,  
28 as highly intensive fluorescence signals coming from one organelle can mask signals of low-  
29 intensity coming from the other one (Duchêne et al., 2005, Sharma et al., 2018b).

30

31 One possibility to circumvent these problems is to detect the fluorescence signals, coming  
32 from each organelle, in separate cells. This has become technically feasible by the invention  
33 of the self-assembling green fluorescent protein (*sasplit*-GFP) technology, a popular approach  
34 developed recently to determine targeting specificity of proteins *in vivo* (Cabantous et al.,  
35 2005). Spontaneous self-assembly of split-GFP relies on two highly engineered fragments  
36 derived from the ‘superfolder’ GFP variant, sfGFP. The large fragment, GFP1-10 OPT  
37 (further referred to as GFP1-10), comprises ten N-terminal antiparallel  $\beta$ -sheets of GFP. The

1 smaller fragment, GFP11 M3 (further referred to as GFP11), comprises only 16 amino acids  
2 and represents the C-terminal 11<sup>th</sup>  $\beta$ -sheet of GFP. When brought into close proximity, the  
3 two fragments can assemble spontaneously to reconstitute the functional fluorophore without  
4 the need of an additional interacting partner (Figure 1a) (Cabantous et al., 2005). For  
5 subcellular protein localization studies, GFP1-10 is fused to a transport signal of known  
6 organelle specificity and analyzed together with a chimeric protein comprising the candidate  
7 protein and GFP11. Fluorescence complementation is achieved specifically and exclusively if  
8 the transport signal of the candidate mediates transport of GFP11 into the organelle housing  
9 GFP1-10. The fluorescence signal remains limited to the compartment containing GFP1-10,  
10 irrespective of whether the GFP11-fused candidate protein is targeted to further subcellular  
11 compartments or not (Figure 1b). Thus, the *sasplit*-GFP technology allows selective *in vivo*  
12 imaging of a protein of interest in a respective compartment with enhanced signal-to-noise  
13 ratio. Furthermore, the small GFP11 tag appears to have a lower propensity for interfering  
14 with membrane transport in comparison to the full length fluorescent proteins used for direct  
15 FP-tagging (Andresen et al., 2004; Giepmans et al., 2006).

16

17 The *sasplit*-GFP system has already been applied to a wide range of organisms and adapted to  
18 elucidate a variety of cellular functions or processes including, for example, *in vivo* protein  
19 solubility, sub-cellular localization of pathogen effectors, endogenous protein labeling for *in*  
20 *vivo* imaging, protein-protein interaction studies, and membrane protein topology  
21 determination (Cabantous and Waldo 2006; Van Engelberg and Palmer, 2010; Machettira et  
22 al., 2011; Cabantous et al., 2013; Kamiyama et al., 2016; Henry et al., 2017). The principal  
23 suitability of the *sasplit*-GFP system for *in vivo* imaging of protein targeting in plant cells has  
24 also been demonstrated recently (Park et al., 2017). In this case, transgenic *Arabidopsis*  
25 *thaliana* lines expressing the organelle-targeted GFP1-10 receptor were transiently  
26 transformed with constructs expressing a candidate protein fused to GFP11 tag. However, the  
27 requirement of transgenic ‘receptor’ plant lines and low transient transformation efficiency  
28 hampers the utilization of this approach for high throughput protein targeting studies. Along  
29 with a limited yield of transformed cells, the relatively low brightness of the *sasplit*-GFP  
30 prevented the visualization of proteins targeted in low amounts into the organelles.

31

32 Therefore, we have here systematically evaluated and optimized the *sasplit*-GFP system for  
33 analysis of protein targeting specificity in plant cells and assessed the effect of  
34 multimerization of the GFP11 tag on the intensity of the fluorescence signals inside  
35 mitochondria and plastids. A *Golden Gate*-based vector toolkit named PlaMiNGo (Analysis  
36 of Plastid and/or Mitochondrial targeted proteins N-terminally fused to GFP11 tags via  
37 *Golden Gate* cloning) was developed to facilitate high-throughput analyses of candidate

1 proteins with high transformation efficiency and enhanced signal-to-noise ratio. With this  
2 approach, dual targeting to mitochondria and plastids could be detected for several proteins  
3 that were previously characterized as being targeted to a single organelle only, which  
4 demonstrates its improved sensitivity. Importantly, plastid targeting of two of these proteins  
5 was independently confirmed using a phenotype complementation-based approach in stable  
6 transgenic *Arabidopsis* plants, which proves the *in vivo* relevance of results obtained with the  
7 PlaMiNGo system.

## 8 9 2. Results-

### 10 11 **2.1 The sasplit-GFP system to determine protein targeting specificity**

12  
13 In order to study protein targeting into plastids, the transit peptide of a chloroplast protein,  
14 ferredoxin-NADP<sup>+</sup>-oxidoreductase of spinach (FNR<sub>1-55</sub>; Zhang et al., 2001), was fused to the  
15 GFP1-10 receptor (the large fragment of the sasplit-GFP system) to facilitate its localization  
16 into plastids. For mitochondrial localization of GFP1-10, the N-terminal 100 amino acid  
17 residues comprising the presequence of the mitochondrial Rieske Fe/S protein of potato  
18 (mtRi<sub>1-100</sub>; Emmermann et al., 1994) were used. Both transport signals had previously been  
19 characterized for their targeting specificity to a single organelle with *in vivo* and *in vitro*  
20 approaches (Rödiger et al., 2011). For the initial experiments evaluating the suitability of the  
21 sasplit-GFP system for our purposes, each transport signal was likewise combined with the  
22 GFP11<sub>x7</sub> tag (small fragment of sasplit-GFP system). A seven-fold repeat of this GFP11 tag  
23 (GFP11<sub>x7</sub>; separated via a 5 amino acid linker) was used, as such multiple GFP11 tags had  
24 been reported to intensify the fluorescence signals in mammalian cells (Kamiyama et al.,  
25 2016). When these constructs were co-expressed with the FNR<sub>1-55</sub>/GFP1-10 and mtRi<sub>1-100</sub>/  
26 GFP1-10 gene constructs, fluorescence signals were exclusively obtained in those  
27 instances in which the same transport signal was present in both chimeras, i.e. in plastids after  
28 co-expression of FNR<sub>1-55</sub>/GFP1-10 and FNR<sub>1-55</sub>/GFP11<sub>x7</sub> and in mitochondria after co-  
29 expression of mtRi<sub>1-100</sub>/GFP1-10 and mtRi<sub>1-100</sub>/GFP11<sub>x7</sub> (Figure 2). When infiltrated alone,  
30 neither of these constructs generated any detectable fluorescence signal (Suppl. Figure 1).  
31 This demonstrates the suitability and specificity of the sasplit-GFP system for the analysis of  
32 protein targeting.

33  
34 Next, we wanted to evaluate the performance of this system by determining the protein  
35 targeting behavior of several dually targeted proteins. For this purpose, we have selected three  
36 previously characterized nuclear-encoded organelle proteins from *Arabidopsis thaliana* with  
37 proven dual targeting characteristics, namely TyrRS (Tyrosine-tRNA synthetase;

1 At3g02660), GrpE (co-chaperone GrpE1; At5g55200), and PDF (peptide deformylase 1B;  
2 At5g14660) (Berglund et al., 2009; Baudisch et al., 2014). Earlier experiments employing  
3 eYFP (enhanced Yellow Fluorescent Protein) fusions had shown that all three proteins are  
4 targeted to both endosymbiotic organelles, either in comparable amounts (TyrRS<sub>1-91</sub>/eYFP) or  
5 preferentially to either mitochondria (GrpE<sub>1-100</sub>/eYFP) or chloroplasts (PDF<sub>1-100</sub>/eYFP)  
6 (Sharma et al., 2018a and Figure 3). The respective N-terminal amino acid sequences carrying  
7 the organelle transport signals of the candidate proteins were fused to GFP11<sub>x7</sub> tags and  
8 analyzed in our system. All three candidates (TyrRS<sub>1-91</sub>/GFP11<sub>x7</sub>, GrpE<sub>1-100</sub>/GFP11<sub>x7</sub> and  
9 PDF<sub>1-100</sub>/GFP11<sub>x7</sub>) showed targeting to both plastids and mitochondria when co-transformed  
10 with the respective organelle-targeted receptors (Figure 3). Even plastid targeting of  
11 GrpE<sub>1-100</sub>/GFP11<sub>x7</sub> was clearly visible, which is remarkable considering the vague  
12 fluorescence signals obtained in this organelle with the ‘standard’ fluorescent reporter fusion  
13 (Figure 3b). Thus, separation of the fluorescence signals for the two organelles into different  
14 cells proved to be advantageous to determine the low plastid targeting properties of GrpE.

15

## 16 **2.2 Multimerization of the GFP11 tag leads to fluorescence signal enhancement in plastids** 17 **but not in mitochondria**

18

19 In the initial experiments described above, we have used GFP11<sub>x7</sub>, the seven-fold repeat of  
20 the GFP11 tag. However, the requirement or benefits of such multiple GFP11 tags to enhance  
21 fluorescence signals in mitochondria and plastids of plant cells were not systematically  
22 assessed. Hence, we have compared the fluorescence signal intensity obtained in the two  
23 organelles with either seven (GFP11<sub>x7</sub>), three (GFP11<sub>x3</sub>) or a single repeat (GFP11<sub>x1</sub>) of the  
24 GFP11 tag when fused to the dually targeted TyrRS<sub>1-91</sub> peptide as protein transport signal. It  
25 turned out that the use of a single GFP11 tag yields only very faint signals in plastids while  
26 the GFP11<sub>x3</sub> and GFP11<sub>x7</sub> tags significantly enhance the fluorescence signals (Figure 4a)  
27 supporting the assumption that multiple GFP11 repeats can boost fluorescence signal intensity  
28 in this organelle. In contrast, for mitochondria no such correlation of number of GFP11 tag  
29 repeats and fluorescence signal intensity was found. Instead, the signal intensities were  
30 largely similar for all three constructs (Figure 4b). However, since the fluorescence signals  
31 obtained with the single GFP11 tag in mitochondria were brighter than in plastids, they are  
32 usually sufficient for proper visualization of organelle.

33

## 34 **2.3 Construction of the PlaMiNGo toolkit**

35

36 To facilitate easy combination of the *sasplit*-GFP technology and fluorescence signal  
37 enhancement for high-throughput screening of protein targeting specificity, we have

1 developed a set of *Golden Gate*-based vectors. Destined to analyze the targeting specificity of  
2 candidate proteins to plastids and mitochondria, these vectors facilitate easy cloning of the  
3 candidate proteins upstream of single or multiple GFP11 tags. In this PlaMiNGo toolkit, we  
4 have utilized highly efficient gene regulatory elements to control the expression of the  
5 chimeric genes, namely a 'long' 35S promoter (Engler et al., 2014) and *ocs* or *rbcs E9*  
6 transcriptional terminators (De Greve et al., 1982; Coruzzi et al., 1984) (Figure 5a and Suppl.  
7 Figure 3). Moreover, to avoid the requirement for performing co-transformation using two  
8 plasmids, we have utilized a single T-DNA expression system (Grefen and Blatt, 2012;  
9 Hecker et al., 2015) comprising two gene expression cassettes. This has the advantage that  
10 each transformed cell expresses both chimeras simultaneously. Consequently, the final  
11 vectors contain expression cassettes, one for GFP1-10 gene chimeras to be targeted to either  
12 plastid or mitochondria by fusion with either mtRi<sub>1-100</sub> or FNR<sub>1-55</sub> and another for one, three or  
13 seven times repeat of GFP11 tags. The latter expression cassette furthermore carries a *ccdB*  
14 cassette upstream of the GFP11 tag, which is replaced by the candidate gene in a single  
15 *Golden Gate* reaction step allowing for background-free selection of positive clones. As a  
16 result, six vectors, three destined to analyze potential plastid targeting and three for  
17 mitochondria targeting analysis, were generated (Figure 5a and Suppl. Figure 3).

18 To evaluate the functionality of these vectors, the dual targeting transport signal of TyrRS (N  
19 terminal 1-91 amino acids) was cloned upstream of the GFP11 tags of all six vectors and  
20 analyzed via *Agrobacterium*-mediated transient transformation of *Nicotiana benthamiana*  
21 leaves. In all instances, tremendously improved signal intensities were observed for both  
22 organelles (Figure 5b and Suppl. Figure 2). Now, even in plastids a single copy of the GFP11  
23 tag was sufficient for reliable detection of the reconstituted GFP fluorescence, although  
24 considerable signal enhancement could still be observed with GFP11<sub>x3</sub> and GFP11<sub>x7</sub> tags.  
25 This suggests that the GFP11<sub>x7</sub> tag, when co-expressed with the plastid targeted GFP1-10  
26 receptor, should allow for detection even of minute amounts of plastid-localized proteins.  
27 Likewise, upon imaging of mitochondria the fluorescence signals obtained with the single  
28 GFP11 tag were more than 3-fold stronger than the signals obtained in the previous  
29 experiments using separate vectors. Still, as observed earlier, no further improvement of  
30 signal intensities by multimerization of the GFP11 tag could be obtained in mitochondria  
31 (Suppl. Figure 2b). Instead, artificial protein aggregates were observed in some cells  
32 expressing constructs with multiple GFP11 tags (GFP<sub>11x3</sub> and GFP<sub>11x7</sub>). However, the overall  
33 mitochondrial morphology, fusion and fission remained unaffected (Suppl. Video 1).

34

#### 35 **2.4 Multicolor imaging of dual protein targeting to two organelles**

36 A further objective of the study was to establish simultaneous multicolor imaging with the  
37 *sasplit*-FP system. For this purpose, we have modified the GFP1-10 receptor to generate a

1 yellow shifted variant (YFP1-10) using a single amino acid substitution (T203Y) as reported  
2 earlier (Kamiyama et al., 2016). To test if this variant can assemble with GFP11 to generate a  
3 functional fluorophore inside the organelles, the plastid (FNR<sub>1-55</sub>) or mitochondria (mtRi<sub>1-100</sub>)  
4 transport signals were separately fused to the N-terminus of YFP1-10. These fusions were co-  
5 infiltrated with a gene construct encoding the dual targeting transport signal TyrRS<sub>1-91</sub> fused  
6 to either GFP11<sub>x1</sub> or GFP11<sub>x7</sub>. When imaged with an YFP-specific filter-set, fluorescence  
7 signals were solely obtained in mitochondria (with mtRi<sub>1-100</sub>/YFP1-10 and TyrRS<sub>1-91</sub>-  
8 <sub>91</sub>/GFP11<sub>x1</sub>) or in plastids (with FNR<sub>1-55</sub>/YFP1-10 and TyrRS<sub>1-91</sub>/GFP11<sub>x7</sub>), demonstrating that  
9 the YFP1-10 fragment can indeed assemble with GFP11 in both organelles (Figure 6a, b).  
10 Next, we have tested if multicolor imaging, i.e. the simultaneous labeling of plastids and  
11 mitochondria with YFP1-10 and GFP1-10, respectively, within the same cell is possible. For  
12 this purpose, the FNR<sub>1-55</sub>/YFP1-10 fusion was co-infiltrated with a vector comprising mtRi<sub>1-100</sub>-  
13 <sub>100</sub>/GFP1-10 and TyrRS<sub>1-91</sub>/GFP11<sub>x1</sub>. This should result in transformed cells co-expressing the  
14 dually targeted GFP11 (via fusion with TyrRS<sub>1-91</sub>) and two different receptors targeted to two  
15 different organelles, namely YFP1-10 to plastids (FNR<sub>1-55</sub>/YFP1-10) and GFP1-10 to  
16 mitochondria (mtRi<sub>1-100</sub>/GFP1-10). Indeed, the resulting transformed cells emitted  
17 fluorescence signals of different spectra in the two organelles due to reassembly of the GFP11  
18 tag with both, the GFP1-10 and YFP1-10 receptors within mitochondria and plastids,  
19 respectively (Figure 6c). However, in all transformed cells a certain degree of "bleed through"  
20 of signals, i.e., the appearance of YFP fluorescence signals in GFP channel and *vice versa*,  
21 could be detected. The adjustment of the filter-sets to avoid such "bleed through" inevitably  
22 led to significant reduction of the fluorescence signal intensity. In summary, the YFP1-10  
23 derivative of *sasplit*-GFP system is not yet perfect for multicolor imaging but represents a  
24 promising basis for development of such tools.

25

## 26 **2.5 Analysis of protein targeting specificity with PlaMiNGo**

27

28 Finally, we have examined the suitability of the PlaMiNGo toolkit using eight candidates with  
29 presumed targeting specificity either to plastids, mitochondria, or to both organelles (Table 1).  
30 Three of these proteins, namely Gtred (Monothiol glutaredoxin-S15), GCS (Glycine cleavage  
31 system H protein 1) and GAPDH (Glyceraldehyde-3-phosphate dehydrogenase B) had earlier  
32 been reported to be dually targeted (Baudisch et al., 2014). Two other candidates, namely  
33 FNR and RbcS (small subunit of Rubisco from pea), are well-characterized plastid proteins  
34 (Highfield and Ellis 1978; Zhang et al., 2001), while the residual three candidates, namely  
35 mtRi, ATPS (ATP synthase subunit beta-3) and CoxIV (Cytochrome *c* oxidase subunit IV) of  
36 yeast, are known for their mitochondrial targeting specificity (Maarse et al., 1984;



1 Emmermann et al., 1994; Baudisch et al., 2014). The protein fragments comprising the  
2 transport signals of these proteins were cloned as fusions with GFP11 tags into the PlaMiNGo  
3 vectors, additionally comprising the organelle targeted receptor fusions FNR<sub>1-55</sub>/YFP1-10 or  
4 mtRi<sub>1-100</sub>/YFP1-10.

5 Five of the eight candidates showed in our assay system the same targeting behavior as  
6 reported in the literature (Table 1): mtRi and FNR showed exclusive transport into either  
7 mitochondria or plastids, respectively (Figure 7a-b) (Rodiger et al., 2011), and the dual  
8 targeting candidates GCS, Gtret and GAPDH showed transport into both organelles (Baudisch  
9 et al., 2014) (Figure 7c-e). It should be noted though that in the case of GAPDH  
10 mitochondrial targeting was rather weak in our assays and could be observed only in few  
11 transformed cells. However, it was rather unexpected that the remaining three monospecific  
12 candidates, namely ATPS<sub>1-100</sub>, RbcS<sub>1-79</sub> and CoxIV<sub>1-29</sub>, showed dual targeting in our  
13 experiments (Figure 8). In the literature, mitochondrial targeting of RbcS has already been  
14 described once (Rudhe et al., 2002) but these results were solely based on *in vitro* assays. In  
15 addition, dual targeting of the yeast mitochondria presequence, CoxIV, could be assumed  
16 considering high degree of freedom of non-plant mitochondria transport signals (Staiger et al.,  
17 2009). However, this dual targeting was entirely unexpected for the plant mitochondrial  
18 protein, ATPS<sub>1-100</sub>, which never showed any targeting to plastids when analyzed with *in vivo*  
19 fluorescent protein tagging and *in vitro* protein transport experiments (Baudisch et al., 2014  
20 and suppl. Figure 4).

21

## 22 **2.6 Phenotype complementation confirms the plastid targeting properties of ATPS**

23

24 These unexpected results demanded for independent confirmation. Thus, to re-evaluate the  
25 plastid targeting properties of the transport signal of mitochondrial ATPS we have applied a  
26 phenotype complementation approach. In this approach, we made use of the *immutans* mutant  
27 of *Arabidopsis thaliana* that shows a white-green sectorized (variegated) leaf phenotype and  
28 stunted growth when grown under daylight conditions. The mutant phenotype is due to the  
29 absence of a functional nuclear-encoded plastid protein, namely plastid terminal oxidase  
30 (PTOX; Carol et al., 1999; Aluru et al., 2001). Complementation of the variegated phenotype  
31 of *immutans* requires a functional PTOX protein in plastids (Fu et al., 2005 and Figure 9c). To  
32 adapt PTOX for our analysis, we have replaced the authentic transit peptide of PTOX with the  
33 N-terminal 100 AA residues of two candidate proteins, namely ATPS and GCS (a validated  
34 dually targeted protein) generating ATPS<sub>1-100</sub>/mPTOX and GCS<sub>1-100</sub>/mPTOX, respectively.  
35 Two further constructions encoding either the authentic PTOX precursor or the transit  
36 peptide-free mature PTOX protein (mPTOX) were generated for comparison. These gene  
37 chimeras were expressed under the control of the CaMV35S promoter in the *immutans* mutant

1 plants. As expected, both the authentic PTOX precursor and GCS<sub>1-100</sub>/mPTOX were able to  
2 complement the variegated phenotype, as expected. In contrast, the expression of mPTOX  
3 cannot complement the mutant phenotype (Figure 9). These results confirm that targeting of  
4 PTOX into plastids is essential for complementation of the *immutans* variegated phenotype.  
5 Remarkably, also the expression of ATPS<sub>1-100</sub>/mPTOX resulted in mutant phenotype  
6 complementation (Figure 9f). However, such complementation was observed in only four  
7 from six transgenic lines analyzed suggesting that plastid targeting of ATPS<sub>1-100</sub>/mPTOX is,  
8 in principle, possible but apparently less efficient than with typical plastid targeted transit  
9 peptides. These results clearly underline the basic plastid targeting properties of  
10 mitochondrial protein ATPS and thus re-confirm the results obtained with the *sasplit*-GFP  
11 technology established here.

12

### 13 3. Discussion-

14

15 The goal of this study was to assess the suitability of the signal enhanced *sasplit*-GFP system  
16 to determine the targeting specificity of nuclear-encoded organelle proteins and to develop  
17 tools for rapid cloning and subsequent analysis of their targeting behavior. The  
18 characterization of the targeting specificity of organelle proteins is crucial (i) to elucidate the  
19 functional properties of the organelle transport machineries, (ii) to study evolutionary aspects  
20 of protein targeting, and (iii) for biotechnological applications employing organelles. The  
21 application of the *sasplit*-GFP system, as demonstrated in this study, provides a novel toolbox  
22 to quickly determine the targeting properties of candidate proteins with high sensitivity.

23

#### 24 **3.1 Selective imaging and fluorescence signal enhancement with *sasplit*-GFP technology**

25

##### 26 3.1.1 Selective Imaging

27 The selective imaging of organelles is one of the major advantages of the *sasplit*-GFP system  
28 in comparison to 'standard' fluorescent protein tagging approaches. The requirement for the  
29 presence of the non-fluorescing GFP1-10 receptor in a specific subcellular location is the key  
30 for selective imaging (Kaddoum et al., 2010). In this study, two transport signals, namely  
31 FNR<sub>1-55</sub> and mtRi<sub>1-100</sub>, were selected for localization of the receptor specifically within two  
32 sub-cellular locations, the plastid stroma and the mitochondrial matrix, respectively. As a  
33 result, fluorescence signals will appear only if the GFP11 tagged protein is completely  
34 imported into the same sub-cellular location and not if a protein is merely binding to the  
35 organelle surface. This was otherwise difficult to distinguish with FP-based approaches,  
36 specifically for mitochondria due to their small size.

37

### 1 3.1.2 Fluorescence signal enhancement

2 The self-assembling split-GFP molecules have been reported to produce fluorescent signals of  
3 lower intensity than ‘standard’ fluorescent proteins (Kökler et al., 2018). This problem can be  
4 circumvented with the use of multiple GFP11 tags. However, the two organelles respond  
5 differently to this modification. While signal enhancement with multiple GFP11 tags works  
6 well in plastids, fluorescence signal enhancement could not be observed in mitochondria  
7 (Figure 4). One possible reason might be the size difference between these organelles.  
8 Plastids are much larger in size and thus the proteins in the plastid stroma are present in lower  
9 concentration. Consequently, the chances for self-assembly of *sasplit*-GFP fragments in this  
10 organelle are lower than in mitochondria and thus fluorescence signal enhancement could be  
11 observed by increasing number of GFP11 tags in plastids. Furthermore, differences in the  
12 physicochemical properties of the two organelles, e.g. pH, might likewise contribute to this  
13 phenomenon.

14 The use of more efficient gene regulatory elements, i.e. promoter and terminator, in the  
15 PlaMiNGo toolkit also led to significant enhancement in fluorescence signal intensity.  
16 However, in combination with multiple GFP11 tags such increased gene expression can lead  
17 to the formation of aggregations in transformed cells, particularly if these tags are combined  
18 with mitochondria targeting transport signals. The intrinsic property of the *sasplit*-GFP  
19 fragments to form dimers and aggregates (Cabantous et al., 2005) and comparatively less  
20 efficient unfoldase activity of the mitochondrial protein translocation machinery (Agarraberes  
21 and Dice 2001) could be one of the possible reasons for this phenomenon. Since, the protein  
22 unfolding prior to translocation is apparently more efficient in plastids, the multiple GFP11  
23 tags can efficiently be imported into this organelle. On the other hand, high expression of  
24 plastid targeted GFP1-10 alone could result in appearance of faint fluorescence signals,  
25 probably due to formation of dimers. However, in most instances, these faint signals are  
26 clearly distinguishable from ‘actual’ fluorescence signal obtained via self-assembly of split-  
27 GFP but still one should consider it as an experimental control to avoid the misinterpretation  
28 of results (Suppl. Images 1).

29

### 30 **3.2 High sensitivity of *sasplit*-fluorescence protein system**

31 Fluorescent signal enhancement in combination with selective imaging makes the *sasplit*-GFP  
32 system highly sensitive with respect to targeting specificity determination. In consequence,  
33 dual targeting of several proteins was newly detected with the PlaMiNGo toolkit developed  
34 here, which had previously been missed due to inherent limitations of ‘standard’ fluorescent  
35 protein tagging approaches. For example, GAPDH shows dual targeting with the *sasplit*-GFP  
36 system, in line with the results of *in vitro* import experiments (Baudisch et al., 2014). In  
37 contrast, with ‘classical’ *in vivo* approaches using FP-tagging, GAPDH appeared to be solely

1 transported into plastids (Baudisch et al., 2014). Similarly, as shown here, the transit peptide  
2 of RbcS is able to translocate the GFP11 tag into mitochondria, but this property remained  
3 undetected with the FP-tagging approach. Remarkably, such mitochondria targeting  
4 properties of the RbcS transit peptide were also found in a recent study employing  
5 sulfadiazine-resistant plants (Tabatabaei et al., 2018). In contrast, dual targeting of the  
6 transport signal of yeast CoxIV had never been reported earlier. It might be a consequence of  
7 the fact that yeast does not contain plastids and thus the transport signal of yeast mitochondria  
8 had not ‘learned’ to distinguish between the two endosymbiotic organelles (Staiger et al.,  
9 2009). The plastid targeting of a yeast mitochondria transport signal has also been reported  
10 earlier (Huang et al., 1990). However, such dual targeting was most unexpected for the  
11 transport signal of ATPS because neither *in vitro* nor *in vivo* approaches gave any hint of the  
12 plastid targeting properties of this transport signal (Baudisch et al., 2014). Even transgenic  
13 plants expressing ATPS<sub>1-100</sub>/eYFP did not show any plastid localization (Suppl. Fig. 4). The  
14 fact, that it was clearly detectable here and that this result could be independently confirmed  
15 by a phenotype complementation approach using *immutans* mutants (Figure 8a, 9f),  
16 underlines the sensitivity of the *sasplit*-GFP technology.

17

### 18 **3.3 Modularity of PlaMiNGO toolkit**

19 The vector toolkit is based on the principle of modular cloning (Weber et al., 2011). Hence,  
20 the components of the PlaMiNGo toolkit can easily be rearranged for *in vivo* imaging of  
21 proteins targeted to various other sub-cellular compartments. The vectors constructed in  
22 module 1 (Suppl. Figure 3) are binary vectors and can be utilized for plant cell transformation  
23 via *Agrobacterium* or via several other methods, e.g. protoplast transformation or particle  
24 bombardment. The gene of interest can be cloned upstream to one of the GFP11 tags with a  
25 single *Golden Gate* cloning reaction. Similarly, GFP1-10 can be targeted to the different sub-  
26 cellular or even sub-organelle compartments via cloning of the specific transport signal N-  
27 terminally in a *Golden Gate* ‘ready’ vector (pTEI176 or pTEI177). These vectors carry a  
28 *ccdB* negative selection cassette upstream of GFP1-10 with *BsaI* restriction sites A|ATG at  
29 the 5’ end and T|TCG at the 3’ end. Consequently, the two vectors carrying GFP11 and  
30 GFP1-10 gene chimeras should be co-expressed in a single cell in order to determine protein  
31 targeting specificity to the organelle of interest.

32

### 33 **3.4 Significance of high dual targeting frequency**

34 The results obtained in this study strongly suggest that the number of dually targeted proteins  
35 is much higher than assumed so far. More than just increasing the list of such proteins, these  
36 findings also highlight the evolutionary conserved nature of organelle translocation  
37 machineries in plant cells. Even if some of these proteins are ‘mistargeted’ to the ‘wrong’

1 organelle, for example, due to protein overexpression, it shows the fundamental targeting  
2 properties of the respective transport signal. The reason of such widespread dual targeting is  
3 still open. On the one hand, it supports the hypothesis that dual targeting might be an  
4 evolutionary remnant (Staiger et al., 2009). On the other hand, the acquisition of dual  
5 targeting properties might still be ongoing process, which allows for the development of  
6 completely new biochemical pathways in an organelle (Martin 2010, Xu et al., 2013). It is,  
7 therefore, important to determine the targeting properties of protein transport signals in order  
8 to understand its physiological role in the plant cell. The *sasplit*-GFP based approach and the  
9 PlaMiNGo toolkit developed here provide important tools to determine the targeting  
10 properties of a protein.

11

12

#### 13 4. Materials and method

14

##### 15 4.1 *Molecular Cloning-*

###### 16 4.1.1 Generation of vectors for co-infiltration

17 The GFP1-10 and GFP11<sub>x7</sub> fragments were amplified by PCR from plasmids pcDNA3.1-GFP  
18 (1-10) and pACUH-GFP11<sub>x7</sub>-mCherry- $\beta$ -tubulin (a gift from Bo Huang lab; Addgene#70218  
19 and #70219) and cloned into pRT100mod-based vectors (Baudisch et al. 2014) either with  
20 digestion/ligation or with Restriction Free cloning (Bond and Naus, 2012). Primers for gene  
21 amplification are summarized in suppl. Table 1. The gene sequence coding for the N-terminal  
22 91 amino acids of TyrRS was amplified from a vector provided by E. Glaser and cloned  
23 accordingly (Baudisch et al. 2014). The above constructions, comprising promoter and  
24 terminator regions (*CaMV35S::Gene of interest:GFP1-10/GFP11<sub>x7</sub>::t35S*), were later sub-  
25 cloned into a *Golden Gate* compatible pLSU4GG binary vector with *BsaI* restriction/ligation  
26 reaction (Erickson et al., 2017). *Golden Gate* cloning was performed in 15  $\mu$ l reaction with  
27 following conditions: 2.5 units of T4 DNA ligase (Thermo Scientific), 5 units of *BsaI*  
28 (Thermo Scientific), 1X BSA, 20 cycles of incubation at 37°C for 2 min and 16°C for 5 min,  
29 final deactivation and denaturation at 50°C for 10 min and 80°C for 10 min respectively.

30

###### 31 4.1.2 Construction of the PlaMiNGo toolkit

32 The modular cloning principle and DNA fragments of the Plant Parts I and II toolkits were  
33 used for vector construction (Weber et al., 2011; Engler et al., 2014; Gantner et al., 2018).  
34 The modules utilized for cloning of *Golden Gate*-based vectors are illustrated in  
35 **Supplementary Figure 3**. *Golden Gate* reactions were performed with 20 fmol of each DNA  
36 module with the following conditions: 2.5 units of T4 DNA ligase (Thermo Scientific), 5  
37 units of *BsaI* or *BpiI* (New England Biolabs), 30 cycles of incubation at 37°C for 2 min and

1 16°C for 5 min, final denaturation at 80°C for 10 min. When required, the restriction/ligation  
2 reactions were subsequently supplemented with fresh ligation buffer and ligase for terminal  
3 ligation, and incubated for  $\geq 3$ h at 16°C. Ligation mixtures were transformed into Dh10b or  
4 *ccdB* survival II cells (Thermo Scientific) and grown plates with appropriate selective  
5 medium. PCR primers for Level 0 modules and gene sequences are summarized in suppl.  
6 Table 2 and 3.

7

#### 8 **4.1.3 Cloning of candidate proteins into PlaMiNGo vectors**

9 The candidate targeting signals (TyrRS<sub>1-91</sub>, FNR<sub>1-55</sub>, mtRi<sub>1-100</sub>, ATPS<sub>1-100</sub>, GCS<sub>1-100</sub>, GAPDH<sub>1-</sub>  
10 <sub>100</sub>, Gtred<sub>1-100</sub>, RbcS<sub>1-79</sub> and CoxIV<sub>1-29</sub>) were amplified from the corresponding cDNA  
11 templates (Nelson et al., 2007; Berglund et al., 2009; Baudisch et al., 2014) and cloned via  
12 standard *Golden Gate* reaction (see above) into PLaMiNGo vectors in exchange for a *ccdB*  
13 negative selection cassette. Overhangs of the fragment to be cloned were A|ATG at the 5' end  
14 and T|TCG at the 3' end. Two additional nucleotides were inserted in some of the fusions to  
15 maintain the reading frame resulting in an additional codon for an alanine residue.

16

#### 17 **4.1.4 Cloning for complementation of the *immutans* phenotype**

18 The gene sequence carrying mature PTOX<sub>57-295</sub> was amplified from a cDNA clone provided  
19 by Steven Rodermeil (Iowa State University, USA) and sub-cloned via restriction free cloning  
20 into pRT100mod-based vectors downstream of the gene sequences coding for the transport  
21 signals of either GCS<sub>1-100</sub> or ATPS<sub>1-100</sub>. Additionally, the PTOX full-length gene and mature  
22 PTOX (lacking the transit peptide) were cloned into empty pRT100mod vectors under control  
23 of CaMV35 promoter and terminator. The candidate gene constructions with promoter and  
24 terminator (*CaMV35S::Candidate:PTOXmat::t35S*) were then cloned into a *Golden Gate*  
25 compatible pLSU4GG binary vector with *BsaI* cut/ligation reaction.

26

#### 27 **4.2 *Agrobacterium* infiltration**

28 The constructs were transformed into electro-competent cells of *Agrobacterium tumefaciens*  
29 GV3101 (pMP90) (Koncz and Schell, 1986). *Agrobacterium* infiltrations of 6 - 8 weeks old  
30 fully expanded *Nicotiana benthamiana* leaves were performed as described by Sharma et al.  
31 (2018a). For co-infiltration, each bacterial strain was adjusted to OD<sub>600</sub> = 0.8 and mixed in a  
32 1:1 ratio prior to infiltration.

33

#### 34 **4.3 Microscopy and imaging -**

35 Confocal laser scanning microscopy was carried out as described by Sharma et al. (2018a).  
36 For GFP/YFP dual channel imaging, the 493-518 (GFP) and 519-620 (YFP) filter ranges

1 were used. When required, brightness and contrast of the images were equally adjusted for  
2 each image to avoid any discrepancy in visualization of signal intensities.

3

#### 4 ***4.4 Signal Quantification-***

5 For quantification of signal intensities, infiltration of all relevant constructs was carried out on  
6 different spots of the same leaf. Three images from each infiltration spot were used for  
7 quantification. Quantification of the signals was performed with raw images using the Fiji  
8 program (Schindelin et al., 2012). For the purpose of quantification, image acquisition was  
9 done with the 20x objective in 7 to 8 Z-stacks covering the epidermal cell layer and later  
10 stacked to project the maximum intensities. The mean gray values of stacked images were  
11 calculated using the ‘Measure’ option of Fiji and further utilized for comparison of the  
12 fluorescence signal strength in arbitrary units (A.U.).

13

#### 14 ***4.5 Growth and transformation of *immutans* plants-***

15 The *Arabidopsis thaliana immutans* seeds (provided by Steven Rodermel, ISU) were  
16 germinated at 5  $\mu\text{mol m}^{-2} \text{s}^{-1}$  lights and 8/16 h light-dark cycles. After three weeks of  
17 germination, the seedlings were transferred to 50  $\mu\text{mol m}^{-2} \text{s}^{-1}$  lights. For induction of  
18 flowering, the plantlets were transferred to >150  $\mu\text{mol m}^{-2} \text{s}^{-1}$  light and incubated at a 16/8 h  
19 light/dark cycle. Floral-dip transformation was performed as described (Davis et al. 2009). At  
20 least three independent T2 transgenic lines were selected in each case for the analysis of  
21 phenotype. After germination at >150  $\mu\text{mol m}^{-2} \text{s}^{-1}$  light in a 8/16 h light/dark cycle, these  
22 plants were transferred to 16/8 h light/dark cycle. Pictures presented here are from 5 week old  
23 plants grown in >150- $\mu\text{mol m}^{-2} \text{s}^{-1}$  light.

24

#### 25 **Competing Interests-**

26 The authors declare no competing interests.

27

28

#### 29 **Acknowledgement-**

30 We would like to thank Theresa Ilse for assistance in cloning, Elzbieta Glaser (Stockholm  
31 University, Sweden), Martin Schattat (Martin Luther University Halle-Wittenberg, Germany)  
32 and Bo Huang (University of California, San Francisco, USA; via Addgene) for kindly  
33 providing constructs and Steven Rodermel (Iowa State University, USA) for providing  
34 *immutans* mutants and the PTOX clone. MS was supported by a fellowship from the BRAVE  
35 project funded by the ERASMUS MUNDUS Action 2 program of the European Union.

36

37

1  
2  
3  
4  
5  
6  
7  
8  
9  
10  
11  
12  
13  
14  
15  
16  
17  
18  
19  
20  
21  
22  
23  
24  
25  
26  
27  
28  
29  
30  
31  
32  
33  
34  
35  
36  
37  
38  
39  
40  
41  
42  
43  
44  
45  
46  
47  
48  
49  
50  
51  
52

#### References-

1. Agarraberes, F.A. and Dice, J.F. (2001) Protein translocation across membranes. *Biochimica et Biophysica Acta (BBA)-Biomembranes*. 1513:1-24.
2. Aluru, M.R., Bae, H., Wu, D. and Rodermeil, S.R. (2001) The *Arabidopsis* *immutans* mutation affects plastid differentiation and the morphogenesis of white and green sectors in variegated plants. *Plant Physiology*. 127:67-77.
3. Andresen, M., Schmitz-Salue, R. and Jakobs, S. (2004) Short tetracysteine tags to  $\beta$ -tubulin demonstrate the significance of small labels for live cell imaging. *Molecular Biology of The Cell*. 15:5616-5622.
4. Baudisch, B., Langner, U., Garz, I. and Klösgen, R.B. (2014) The exception proves the rule? Dual targeting of nuclear- encoded proteins into endosymbiotic organelles. *New Phytologist*. 201:80-90.
5. Berglund, A.K., Pujol, C., Duchene, A.M. and Glaser, E. (2009) Defining the determinants for dual targeting of amino acyl-tRNA synthetases to mitochondria and chloroplasts. *Journal of Molecular Biology*. 393:803-814.
6. Bond, S.R. and Naus, C.C. (2012) RF-Cloning.org: an online tool for the design of restriction-free cloning projects. *Nucleic Acids Research*. 40:W209-W213.
7. Cabantous, S., Terwilliger, T.C. and Waldo, G.S. (2005) Protein tagging and detection with engineered self-assembling fragments of green fluorescent protein. *Nature Biotechnology*. 23:102.
8. Cabantous, S. and Waldo, G.S. (2006) In vivo and in vitro protein solubility assays using split GFP. *Nature Methods*. 3:845.
9. Cabantous, S., Nguyen, H.B., Pedelacq, J.D., Koraïchi, F., Chaudhary, A., Ganguly, K., Lockard, M.A., Favre, G., Terwilliger, T.C. and Waldo, G.S. (2013) A new protein-protein interaction sensor based on tripartite split-GFP association. *Scientific Reports*, 3:2854.
10. Carol, P., Stevenson, D., Bisanz, C., Breitenbach, J., Sandmann, G., Mache, R., Coupland, G. and Kuntz, M. (1999) Mutations in the *Arabidopsis* gene *IMMUTANS* cause a variegated phenotype by inactivating a chloroplast terminal oxidase associated with phytoene desaturation. *The Plant Cell*. 11:57-68.
11. Cheng, N.H. (2008) *AtGRX4*, an *Arabidopsis* chloroplastic monothiol glutaredoxin, is able to suppress yeast *grx5* mutant phenotypes and respond to oxidative stress. *FEBS Letters*. 582:848-854.
12. Coruzzi, G., Broglie, R., Edwards, C. and Chua, N.H. (1984) Tissue- specific and light- regulated expression of a pea nuclear gene encoding the small subunit of ribulose- 1, 5- biphosphate carboxylase. *The EMBO Journal*, 3:1671-1679.



- 1 13. Davis, A.M., Hall, A., Millar, A.J., Darrah, C. and Davis, S.J. (2009) Protocol:  
2 Streamlined sub-protocols for floral-dip transformation and selection of transformants in  
3 *Arabidopsis thaliana*. *Plant Methods*. 5:3.  
4
- 5 14. De Greve H., Dhaese P., Seurinck J., Lemmers M, Van Montagu M, Schell J. (1982)  
6 Nucleotide sequence and transcript map of the *Agrobacterium tumefaciens* Ti plasmid-  
7 encoded octopine synthase gene. *Journal of Molecular and Applied Genetics*. 1:499–511  
8
- 9 15. Duchêne, A.M., Giritch, A., Hoffmann, B., Cognat, V., Lancelin, D., Peeters, N.M.,  
10 Zaepfel, M., Maréchal-Drouard, L. and Small, I.D. (2005) Dual targeting is the rule for  
11 organellar aminoacyl-tRNA synthetases in *Arabidopsis thaliana*. *Proceedings of the*  
12 *National Academy of Sciences*. 102:16484-16489.  
13
- 14 16. Emmermann, M., Clericus, M., Braun, H.P., Mozo, T., Heins, L., Kruff, V. and Schmitz,  
15 U.K. (1994) Molecular features, processing and import of the Rieske iron sulfur protein  
16 from potato mitochondria. *Plant molecular biology*. 25:271-281.  
17
- 18 17. Engler, C., Youles, M., Gruetzner, R., Ehnert, T.M., Werner, S., Jones, J.D., Patron, N.J.  
19 and Marillonnet, S. (2014) A golden gate modular cloning toolbox for plants. *ACS*  
20 *synthetic biology*. 3:839-843.  
21
- 22 18. Erickson, J. L., Kantek, M., and Schattat, M. H. (2017) Plastid-nucleus distance alters the  
23 behavior of stromules. *Frontiers in Plant Science*. 8:1135.  
24
- 25 19. Fu, A., Park, S. and Rodermel, S. (2005) Sequences required for the activity of PTOX  
26 (IMMUTANS), a plastid terminal oxidase in vitro and in planta mutagenesis of iron-  
27 binding sites and a conserved sequence that corresponds to exon 8. *Journal of Biological*  
28 *Chemistry*. 280:42489-42496.  
29
- 30 20. Van Engelenburg, S.B. and Palmer, A.E. (2010) Imaging type-III secretion reveals  
31 dynamics and spatial segregation of *Salmonella* effectors. *Nature Methods*. 7:325.  
32
- 33 21. Gantner, J., Ordon, J., Ilse, T., Kretschmer, C., Gruetzner, R., Löffke, C., Dagdas, Y.,  
34 Bürstenbinder, K., Marillonnet, S. and Stüttmann, J. (2018) Peripheral infrastructure  
35 vectors and an extended set of plant parts for the Modular Cloning system. *PLoS*  
36 *One*. 13:0197185.  
37
- 38 22. Giepmans, B.N., Adams, S.R., Ellisman, M.H. and Tsien, R.Y. (2006) The fluorescent  
39 toolbox for assessing protein location and function. *Science*. 312:217-224.  
40
- 41 23. Grefen, C. and Blatt, M.R. (2012) A 2in1 cloning system enables ratiometric bimolecular  
42 fluorescence complementation (rBiFC). *Biotechniques*. 53:311-314.  
43
- 44 24. Hecker, A., Wallmeroth, N., Peter, S., Michael, R.B., Harter, K. and Grefen, C. (2015)  
45 Binary 2in1 vectors improve in planta (co-) localisation and dynamic protein interaction  
46 studies. *Plant Physiology* 168:776-87.  
47
- 48 25. Henry, E., Toruño, T.Y., Jauneau, A., Deslandes, L., Coaker, G.L. (2017) Direct and  
49 indirect visualization of bacterial effector delivery into diverse plant cell types during  
50 infection. *Plant Cell*. 29: 1555–1570  
51
- 52 26. Highfield, P.E. and Ellis, R.J. (1978) Synthesis and transport of the small subunit of  
53 chloroplast ribulose biphosphate carboxylase. *Nature*. 271:420.  
54

- 1 27. Huang, J., Hack, E., Thornburg, R.W. and Myers, A.M. (1990) A yeast mitochondrial  
2 leader peptide functions in vivo as a dual targeting signal for both chloroplasts and  
3 mitochondria. *The Plant Cell*. 2:1249-1260.
- 4
- 5 28. Kaddoum, L., Magdeleine, E., Waldo, G.S., Joly, E. and Cabantous, S. (2010) One-step  
6 split GFP staining for sensitive protein detection and localization in mammalian cells.  
7 *Biotechniques*, 49:727-8.
- 8
- 9 29. Kamiyama, D., Sekine, S., Barsi-Rhyne, B., Hu, J., Chen, B., Gilbert, L.A., Ishikawa, H.,  
10 Leonetti, M.D., Marshall, W.F., Weissman, J.S. and Huang, B. (2016) Versatile protein  
11 tagging in cells with split fluorescent protein. *Nature Communications*. 7:11046.
- 12
- 13 30. Koncz, C. and Schell, J. (1986) The promoter of T L-DNA gene 5 controls the tissue-  
14 specific expression of chimaeric genes carried by a novel type of *Agrobacterium* binary  
15 vector. *Molecular and General Genetics*. 204:383-396.
- 16
- 17 31. Köhler, R.H., Zipfel, W.R., Webb, W.W. and Hanson, M.R. (1997) The green  
18 fluorescent protein as a marker to visualize plant mitochondria in vivo. *The Plant*  
19 *Journal*. 11:613-621.
- 20 32. Köker, T., Fernandez, A. and Pinaud, F. (2018) Characterization of Split Fluorescent  
21 Protein Variants and Quantitative Analyses of Their Self-Assembly Process. *Scientific*  
22 *reports*. 8:5344.
- 23
- 24 33. Maarse, A.C., Van Loon, A.P., Riezman, H., Gregor, I., Schatz, G. and Grivell, L.A.  
25 (1984) Subunit IV of yeast cytochrome c oxidase: cloning and nucleotide sequencing of  
26 the gene and partial amino acid sequencing of the mature protein. *The EMBO*  
27 *Journal*. 3:2831-2837.
- 28
- 29 34. Machettira, A.B., Gross, L.E., Sommer, M.S., Weis, B.L., Englich, G., Tripp, J. and  
30 Schleiff, E. (2011) The localization of Tic20 proteins in *Arabidopsis thaliana* is not  
31 restricted to the inner envelope membrane of chloroplasts. *Plant Molecular*  
32 *Biology*. 77:381.
- 33
- 34 35. Marques, J.P., Schattat, M.H., Hause, G., Dudeck, I. and Klösgen, R.B. (2004) In vivo  
35 transport of folded EGFP by the  $\Delta$ pH/TAT-dependent pathway in chloroplasts of  
36 *Arabidopsis thaliana*. *Journal of Experimental Botany*. 55:1697-1706.
- 37
- 38 36. Martin W (2010) Evolutionary origins of metabolic compartmentalization in eukaryotes.  
39 *Philos Trans R Soc B*. 365:847–855
- 40
- 41 37. Moseler, A., Aller, I., Wagner, S., Nietzel, T., Przybyla-Toscano, J., Mühlenhoff, U.,  
42 Lill, R., Berndt, C., Rouhier, N., Schwarzländer, M. and Meyer, A.J. (2015) The  
43 mitochondrial monothiol glutaredoxin S15 is essential for iron-sulfur protein maturation  
44 in *Arabidopsis thaliana*. *Proceedings of the National Academy of Sciences*. 112:13735-  
45 13740.
- 46
- 47 38. Moore, I. and Murphy, A., (2009) Validating the location of fluorescent protein fusions  
48 in the endomembrane system. *The Plant Cell*. 21:1632-1636.
- 49
- 50 39. Nelson, B.K., Cai, X. and Nebenführ, A. (2007) A multicolored set of in vivo organelle  
51 markers for co-localization studies in *Arabidopsis* and other plants. *The Plant*  
52 *Journal*, 51:1126-1136.
- 53

- 1 40. Park, E., Lee, H.Y., Woo, J., Choi, D. and Dinesh-Kumar, S.P. (2017) Spatiotemporal  
2 monitoring of *Pseudomonas* effectors via type III secretion using split fluorescent protein  
3 fragments. *The Plant Cell*. 29:1571-1584.  
4
- 5 41. Rao, R.S.P., Salvato, F., Thal, B., Eubel, H., Thelen, J.J. and Møller, I.M. (2017) The  
6 proteome of higher plant mitochondria. *Mitochondrion*. 33:22-37.  
7
- 8 42. Rödiger, A., Baudisch, B., Langner, U. and Klösgen, R.B. (2011) Dual targeting of a  
9 mitochondrial protein: the case study of cytochrome c1. *Molecular Plant*. 4:679-687.  
10
- 11 43. Rudhe, C., Chew, O., Whelan, J. and Glaser, E., 2002. A novel in vitro system for  
12 simultaneous import of precursor proteins into mitochondria and chloroplasts. *The Plant*  
13 *Journal*. 30:213-220.  
14
- 15 44. Schindelin, J., Arganda-Carreras, I., Frise, E., Kaynig, V., Longair, M., Pietzsch, T.,  
16 Preibisch, S., Rueden, C., Saalfeld, S., Schmid, B. and Tinevez, J.Y. (2012) Fiji: an  
17 open-source platform for biological-image analysis. *Nature Methods*. 9:676.  
18
- 19 45. Sharma, M., Bennewitz, B. and Klösgen, R.B. (2018) Dual or Not Dual?—Comparative  
20 Analysis of Fluorescence Microscopy-Based Approaches to Study Organelle Targeting  
21 Specificity of Nuclear-Encoded Plant Proteins. *Frontiers in Plant Science*. 9:1350  
22
- 23 46. Sharma, M., Bennewitz, B. and Klösgen, R.B. (2018) Rather rule than exception? How  
24 to evaluate the relevance of dual protein targeting to mitochondria and chloroplasts.  
25 *Photosynthesis research*, 138(3), 335-343.  
26
- 27 47. Staiger, C., Hinneburg, A. and Klösgen, R.B. (2009) Diversity in degrees of freedom of  
28 mitochondrial transit peptides. *Molecular Biology and Evolution*. 26:1773-1780.  
29
- 30 48. Tabatabaei, I., Dal Bosco, C., Bednarska, M., Ruf, S., Meurer, J. and Bock, R. (2018) A  
31 highly efficient sulfadiazine selection system for the generation of transgenic plants and  
32 algae. *Plant Biotechnology Journal*. doi: 10.1111/pbi.13004. [Epub ahead of print]  
33
- 34 49. Tanz, S.K., Castleden, I., Small, I.D. and Millar, A.H. (2013) Fluorescent protein tagging  
35 as a tool to define the subcellular distribution of proteins in plants. *Frontiers in Plant*  
36 *Science*. 4:214.  
37
- 38 50. Weber, E., Engler, C., Gruetzner, R., Werner, S., and Marillonnet, S. (2011). A modular  
39 cloning system for standardized assembly of multigene constructs. *PLoS ONE* 6:e16765.  
40
- 41 51. Wetzel, C.M., Jiang, C.Z., Meehan, L.J., Voytas, D.F. and Rodermel, S.R. (1994)  
42 Nuclear—organelle interactions: the immutans variegation mutant of *Arabidopsis* is  
43 plastid autonomous and impaired in carotenoid biosynthesis. *The Plant Journal*. 6:161-  
44 175.  
45
- 46 52. van Wijk, K.J. and Baginsky, S. (2011) Plastid proteomics in higher plants: current state  
47 and future goals. *Plant Physiology*. 155:1578-1588.  
48
- 49 53. Xu, L., Carrie, C., Law, S.R., Murcha, M.W. and Whelan, J. (2013) Acquisition,  
50 conservation, and loss of dual-targeted proteins in land plants. *Plant*  
51 *Physiology*. 161:644-662.  
52
- 53 54. Zhang, H., Whitelegge, J.P. and Cramer, W.A., (2001) Ferredoxin: NADP+  
54 oxidoreductase is a subunit of the chloroplast cytochrome b6/f Complex. *Journal of*  
55 *Biological Chemistry*. 276:38159-38165.

1  
2  
3  
4

**Table 1- Sub-cellular localization of candidate proteins as determined with different approaches.**

| Candidate | <i>sasplit</i> -GFP | <i>in vitro</i> import*      | FP Localization                                                           | Gene Accession |
|-----------|---------------------|------------------------------|---------------------------------------------------------------------------|----------------|
| FNR       | Chloro              | Chloro <sup>2</sup>          | Chloro <sup>2</sup>                                                       | M86349.1       |
| mtRi      | Mito                | Mito <sup>2</sup>            | Mito <sup>2</sup>                                                         | X79332.1       |
| GCS       | Mito and Chloro     | Mito and Chloro <sup>2</sup> | Mito and Chloro <sup>2</sup>                                              | At2g35370      |
| GAPDH     | Mito and Chloro     | Mito and Chloro <sup>2</sup> | Chloro <sup>2</sup>                                                       | At1g42970      |
| Gtred     | Mito and Chloro     | Mito and Chloro <sup>2</sup> | Mito and Chloro <sup>2</sup> ,<br>Chloro <sup>4</sup> , Mito <sup>5</sup> | At3g15660      |
| CoxIV     | Mito and Chloro     | NA                           | Mito <sup>6</sup>                                                         | SGD:S000003155 |
| ATPS      | Mito and Chloro     | Mito <sup>2</sup>            | Mito <sup>2</sup>                                                         | At5g08680      |
| SSU       | Mito and Chloro     | Mito and Chloro <sup>1</sup> | Chloro <sup>3</sup>                                                       | XM_016585367   |

\*Import studies were performed with the authentic precursor proteins; *NA*- not available ;  
<sup>1</sup>Rudhe et al., 2002; <sup>2</sup> Baudisch et al., 2014; <sup>3</sup>Nelson et al., 2007; <sup>4</sup>Cheng, 2008; <sup>5</sup>Moseler et al., 2015; <sup>6</sup>Köhler et al., 2003; *Mito*- mitochondria; *Chloro*- Chloroplasts or plastids.

## Figures-

a) Self assembling split-GFP system (*sasplit-GFP*)

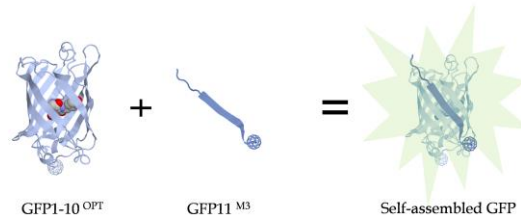

b) Selective organelle imaging

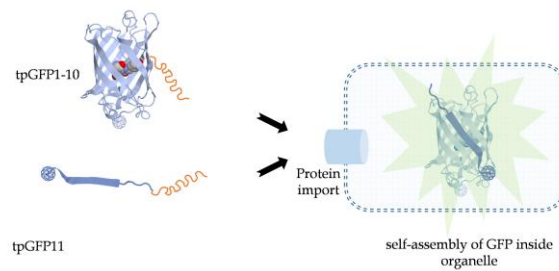

**Figure 1-** Schematic drawing illustrating the principle of the *sasplit-GFP* system. **(a)** Two non-fluorescing fragments, GFP1-10 and GFP11, can self-assemble to generate a fluorescing GFP molecule. **(b)** Transport of both GFP chimeras into the same organelle is essential to achieve fluorescence signals.

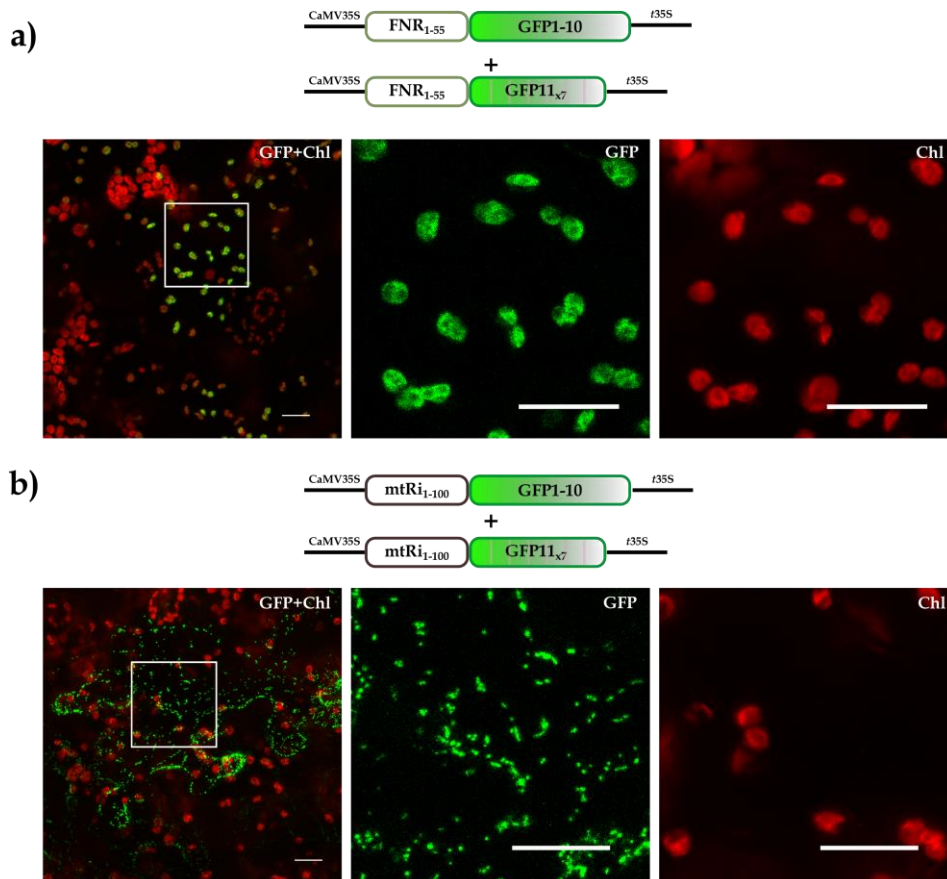

**Figure 2-** Establishment of the *sasplit*-GFP system for *in vivo* organelle imaging. The coding sequences of (a) FNR<sub>1-55</sub>/GFP1-10 and FNR<sub>1-55</sub>/GFP11<sub>x7</sub> (b) mtRi<sub>1-100</sub>/GFP1-10 and mtRi<sub>1-100</sub>/GFP11<sub>x7</sub> were transiently co-expressed after *Agrobacterium* co-infiltration into the lower epidermis of *Nicotiana benthamiana* leaves and analyzed by confocal laser scanning microscopy (CLSM). Image acquisition of transformed cells was done with 20-x objective in several Z-stacks, which were subsequently stacked for maximum intensity projection. Representative cells (*left panels*) are presented as overlay images of the chlorophyll channel (displayed in red) and the GFP channel (displayed in green). The strong chlorophyll signals in the background are derived from the larger chloroplasts of untransformed mesophyll cells underneath the epidermal cell layers. The *squares* highlight areas of the transformed cells that are shown in higher magnification separately for the chlorophyll channel (*middle panels*) and the GFP channel (*right panel*) as indicated. Scale bars correspond to 20  $\mu$ m.

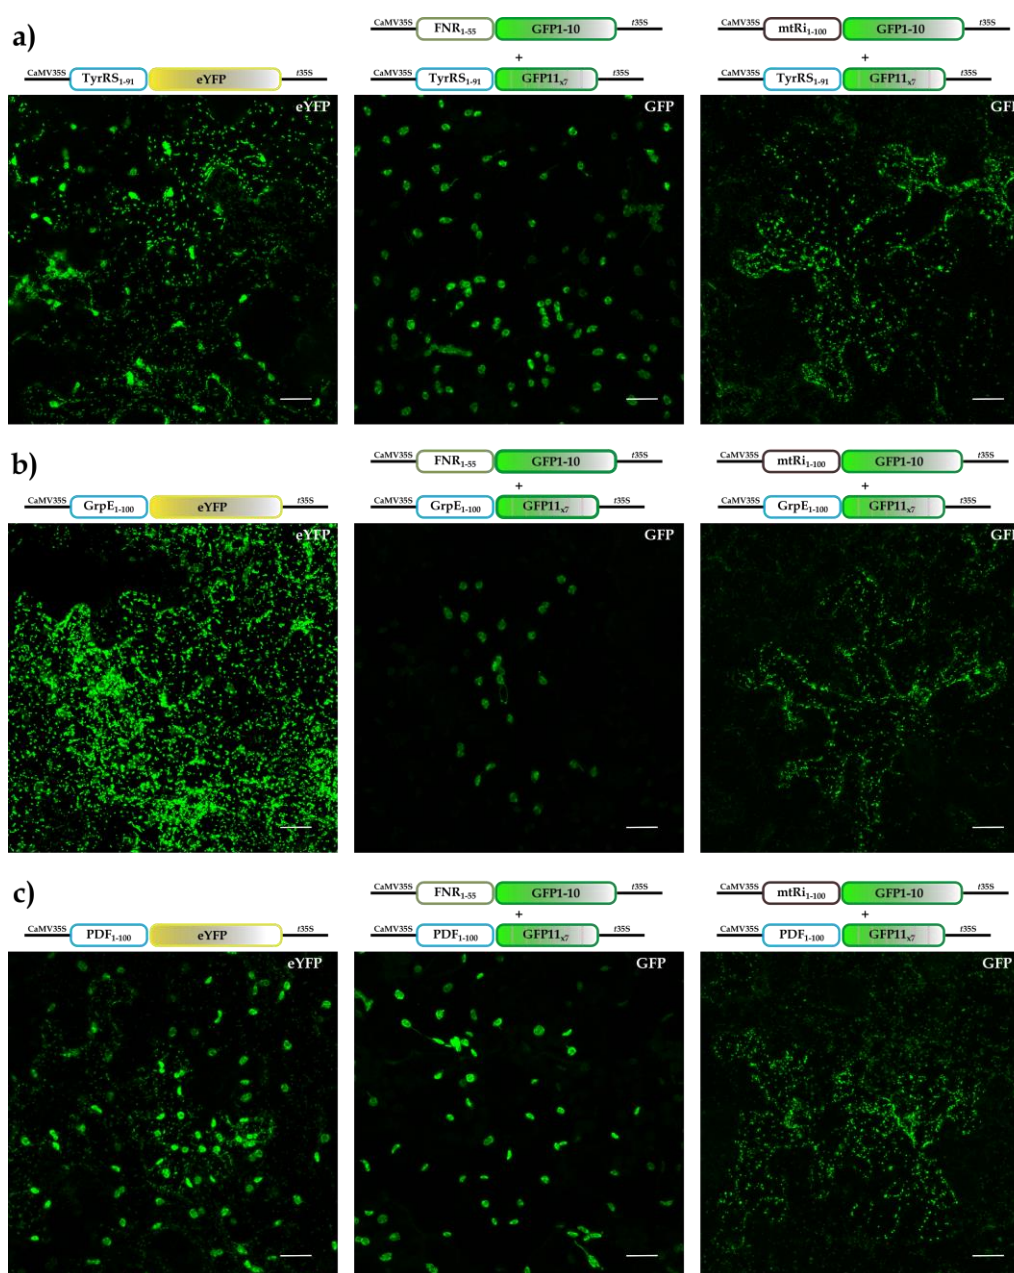

**Figure 3-** Comparison of FP-tagging and split-GFP approaches to analyze the targeting specificity candidate proteins with proven dual-targeting properties. The coding sequences of **(a)** TyrRS<sub>1-91</sub>/GFP11<sub>x7</sub>, **(b)** GrpE<sub>1-100</sub>/GFP11<sub>x7</sub> and, **(c)** PDF<sub>1-100</sub>/GFP11<sub>x7</sub> were transiently expressed with either FNR<sub>1-55</sub>/GFP1-10 (*middle panels*) or mtRi<sub>1-100</sub>/GFP1-10 (*right panels*) via *Agrobacterium* co-infiltration into the lower epidermis of *Nicotiana benthamiana* leaves and analyzed by CLSM. For comparison the respective eYFP fusions namely **(a)** TyrRS<sub>1-91</sub>/eYFP, **(b)** GrpE<sub>1-100</sub>/eYFP, and **(c)** PDF<sub>1-100</sub>/eYFP were transiently expressed as well and analyzed by CLSM (*left panels*). For further details see the legend of Figure 2. Scale bars correspond to 20  $\mu$ m.

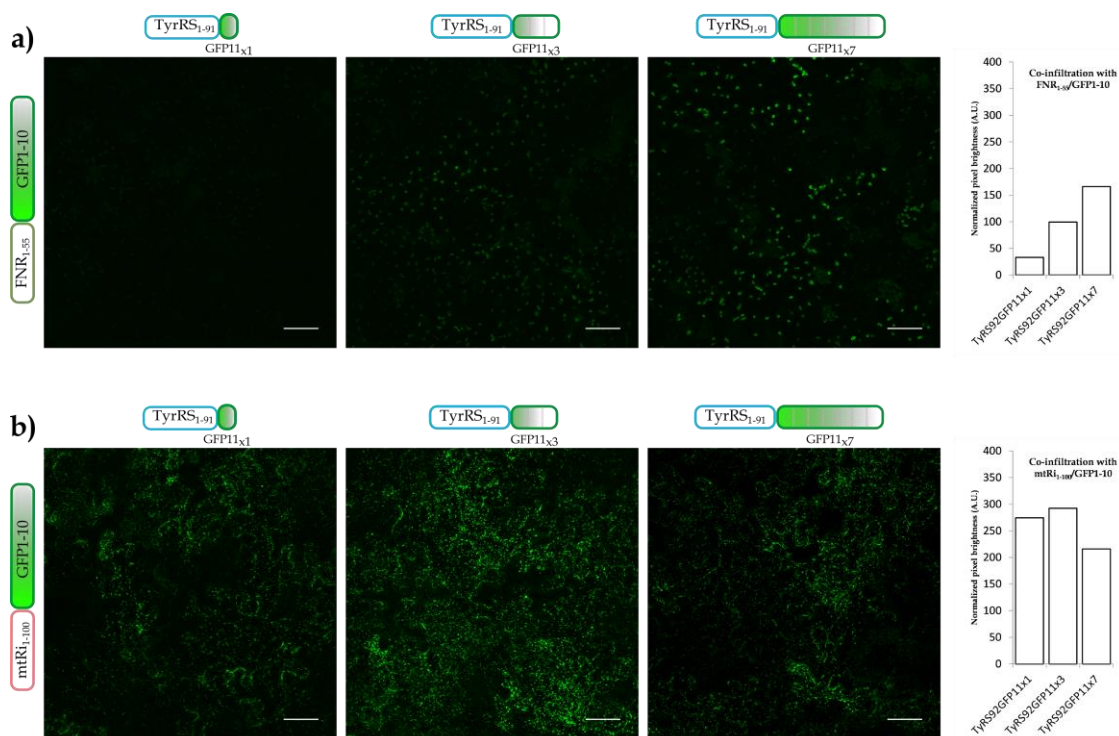

**Figure 4-** Effect of multiple GFP11 tags on fluorescence signal intensity. The gene coding sequence of the dual targeting transit peptide TyrRS<sub>1-91</sub> was fused with different GFP11 variants and co-expressed with either **(a)** FNR<sub>1-55</sub>/GFP1-10 or **(b)** mtRi<sub>1-100</sub>/GFP1-10 in *Nicotiana benthamiana* lower epidermal cells. The graph represents normalized average pixel brightness obtained after subtraction of background fluorescence signals in arbitrary units (A.U.) from 9 maximum intensity projected images for each experiment, obtained from two plant replicates (see suppl. Figure 2 for absolute quantification). Scale bars correspond to 50  $\mu$ m.



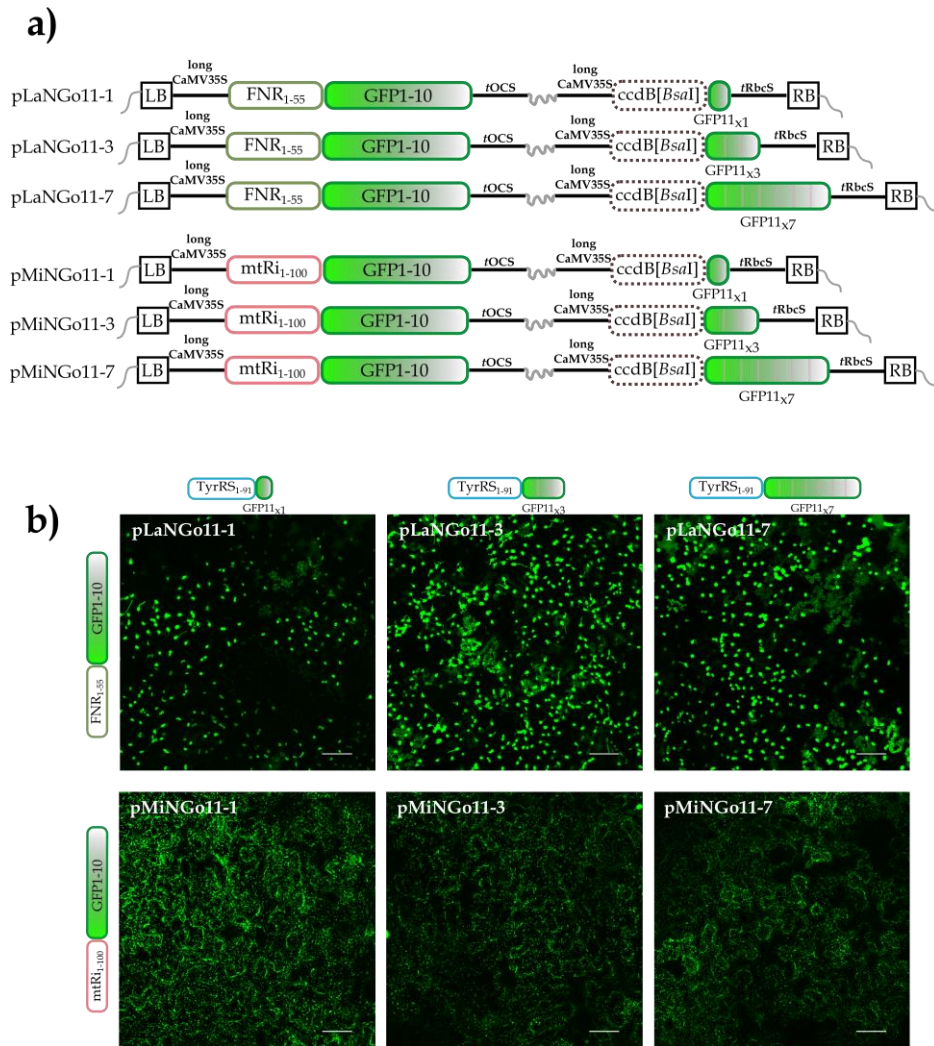

**Figure 5-** PlaMiNGo toolkit **(a)** Schematic representation of the vectors generated (see Supplementary Figure 3 for details) **(b)** PlaMiNGo vectors carrying the dually targeted TyrRS<sub>1-19</sub> transit peptide at the N-terminus of GFP11 tags were used to transform *Nicotiana benthamiana* lower epidermis cells via *Agrobacterium* infiltration. The quantification of signals is presented in supplementary Figure 2. Scale bars correspond to 50  $\mu$ m.

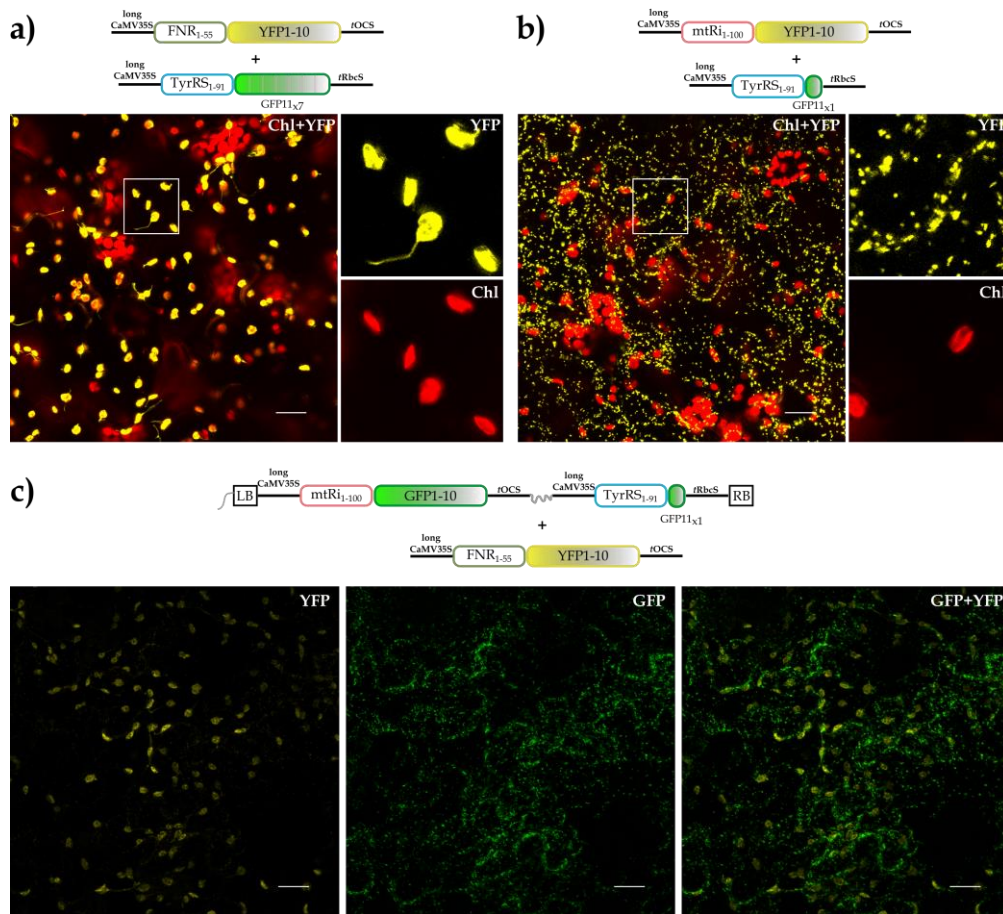

**Figure 6-** Multicolor imaging with *sasplit*-YFP. The gene coding sequences of **(a)** FNR<sub>1-55</sub>/YFP1-10 and TyrRS<sub>1-91</sub>/GFP11<sub>x7</sub>, or **(b)** mtRi<sub>1-100</sub>/YFP1-10 and TyrRS<sub>1-91</sub>/GFP11<sub>x1</sub> were transiently co-expressed in *Nicotiana benthamiana* leaf epidermis and analyzed by CLSM. **(c)** For the purpose of simultaneous multicolor imaging within the same cell, the PlaMiNGO vector comprising mtRi<sub>1-100</sub>/GFP1-10 and TyrRS<sub>1-91</sub>/GFP11<sub>x1</sub> was co-infiltrated with FNR<sub>1-55</sub>/YFP1-10 resulting in self-assembly of GFP in mitochondria and YFP in plastids. Scale bars correspond to 20  $\mu$ m.

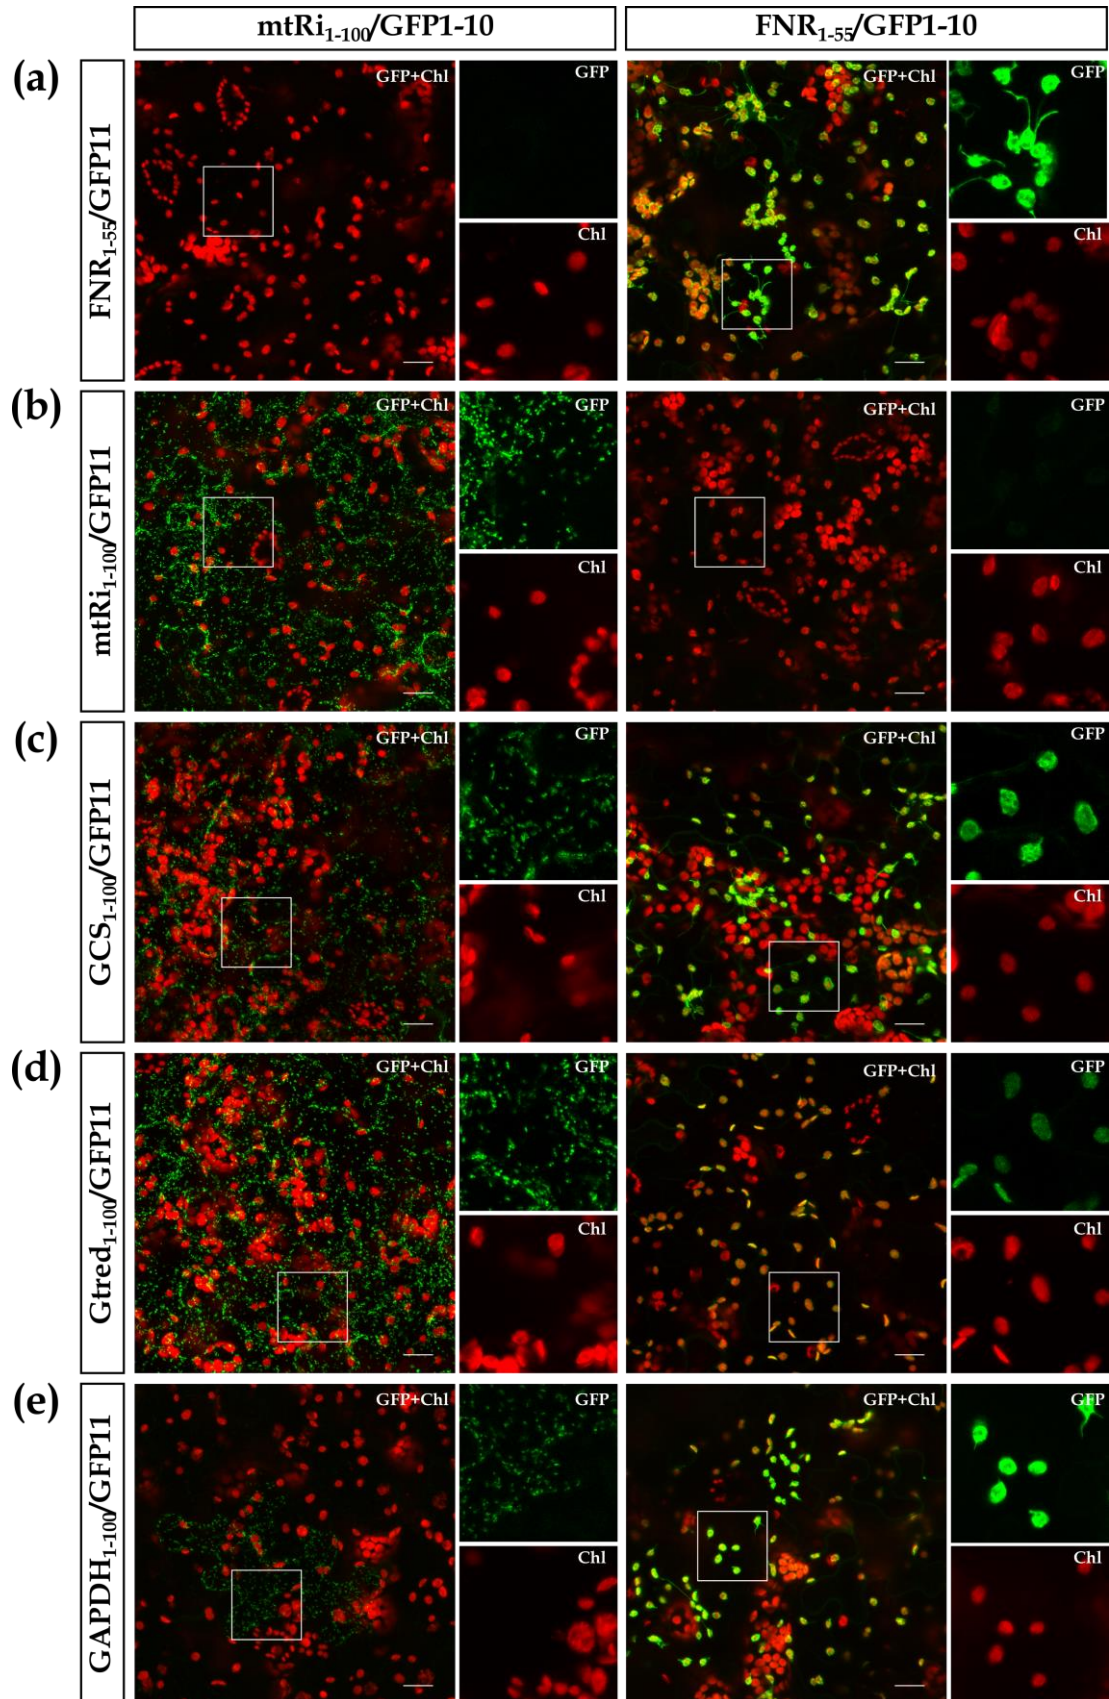

**Figure 7-** Analysis of candidate proteins with the PLaMiNGo toolkit. Gene fragments encoding the transport signals of either (a) FNR, (b) mtRi, (c) GCS, (d) Gtred or (e) GAPDH, were cloned upstream of GFP11<sub>x1</sub> and GFP11<sub>x7</sub> tags in the two PlaMiNGo vectors comprising either mtRi<sub>1-100</sub>/GFP1-10 (*left panels*) or FNR<sub>1-55</sub>/GFP1-10 (*right panels*) respectively. The resulting constructs were used to transform the lower epidermis of *Nicotiana benthamiana* leaves via *Agrobacterium* infiltration. For further details see the legend of Figure 2. Scale bars correspond to 20  $\mu$ m.

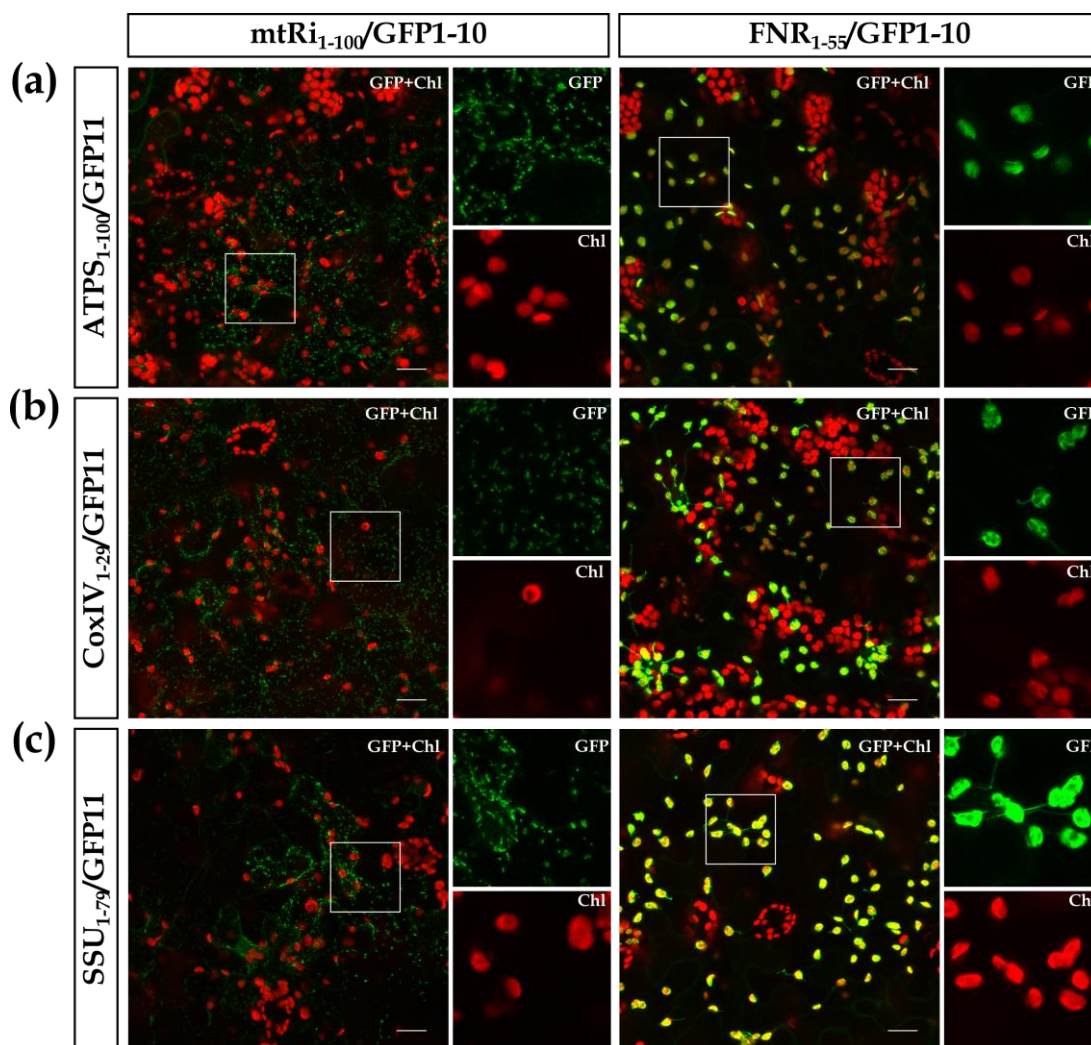

**Figure 8-** Dual localization of presumed monospecific candidate proteins. Gene fragments encoding the transport signals of either (a) ATPS, (b) CoxIV or (c) SSU, were cloned upstream of the GFP11<sub>x7</sub> tag in the two PlaMiNGo vectors comprising either mtRi<sub>1-100</sub>/GFP1-10 (*left panels*) or FNR<sub>1-55</sub>/GFP1-10 (*right panels*). The resulting constructs were used to transform the lower epidermis of *Nicotiana benthamiana* leaves via *Agrobacterium* infiltration. For further details, see the legend of Figure 2. Scale bars correspond to 20  $\mu$ m.

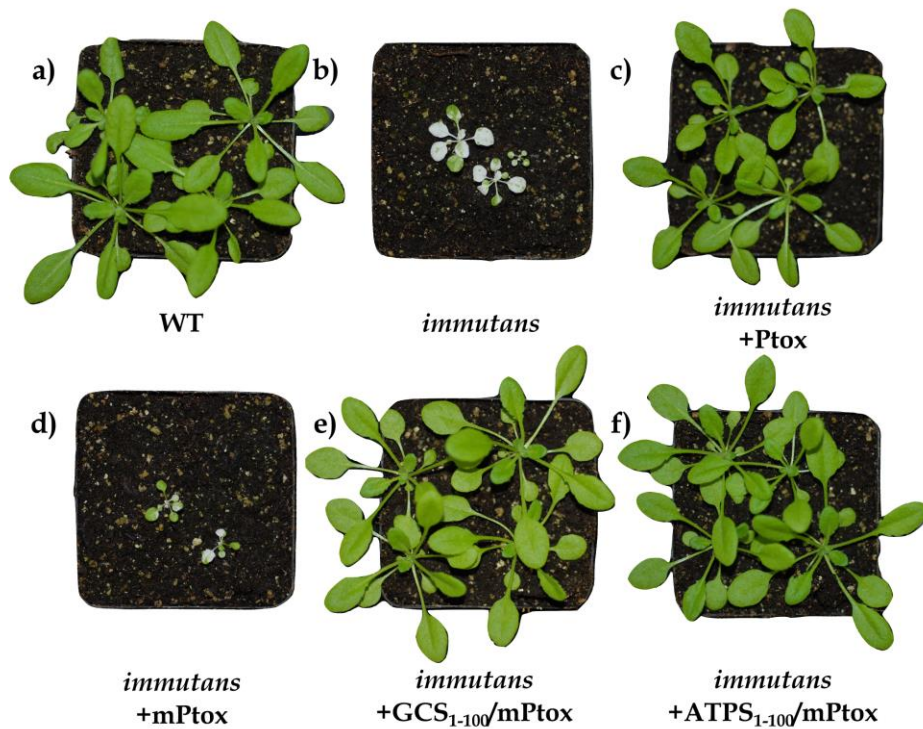

**Figure 9-** Complementation analysis of the *immutans* mutant of *Arabidopsis thaliana*. Phenotype of (a) wild type Col-0 and (b) *immutans* mutant plants. Gene constructions encoding either (c) the precursor PTOX (Ptox), (d) the mature PTOX (mPTOX) or PTOX fused to the transit peptides of the candidate proteins (e) GCS or (f) ATPS, were used to transform *immutans* mutant plants for generation of complementation lines. At least three independently transgenic lines were examined for variegated phenotype complementation of the variegated *immutans* phenotype. The figure shows representative 5 weeks old T2 generation plants.
